# Supplementary material for: Simu-D: A Simulator-Descriptor Suite for Polymer-Based Systems under Extreme Conditions
Source: MDPI journal article supplement (doi:10.3390/ijms222212464), 2021-11-18
Supplement: s1 [file s1]

This area requires a 3D PDF enabled viewer such as Adobe Reader.

Figure 12a. System snapshots of polymer nanocomposite ( $N = 100$ ,  $N_{ch} = 48$ ) at different effective packing density,  $\rho_{eff}$ . The nanofiller, shown in red, corresponds to a single, impenetrable sphere with diameter  $d_{sph}$  (in units of  $\sigma$ ) whose center is located at the center of the simulation cell:  $\rho_{eff} = 0.01$ ,  $d_{sph} = 5$ . Monomers are colored according to the parent chain and are shown as semitransparent spheres for clarity.
