# Supplementary material for: Simu-D: A Simulator-Descriptor Suite for Polymer-Based Systems under Extreme Conditions
Source: MDPI journal article supplement (doi:10.3390/ijms222212464), 2021-11-18
Supplement: s1 [file s1]

This area requires a 3D PDF enabled viewer such as Adobe Reader.

Figure 13b. System snapshots of polymer nanocomposite ( $N = 100$ ,  $N_{ch} = 48$ ,  $\epsilon_{eff} = 0.10$ ). The nanofiller, shown in blue, corresponds to a single, impenetrable cylinder with diameter  $d_{cyl} = 5$  (in units of  $\sigma$ ) and infinite length. The cylinder is oriented along the direction of one of the cell axes.). Semi-flexible, rod-like chains ( $\theta = 0^\circ$ ). Monomers are colored according to the parent chain and are shown as semitransparent spheres for clarity.
