# Supplementary material for: Simu-D: A Simulator-Descriptor Suite for Polymer-Based Systems under Extreme Conditions
Source: MDPI journal article supplement (doi:10.3390/ijms222212464), 2021-11-18
Supplement: s1 [file s1]

This area requires a 3D PDF enabled viewer such as Adobe Reader.

Figure 7a. Snapshots of the semi-flexible  $N = 12$  system ( $\theta = 90^\circ$ ) at  $\phi = 0.58$ . Initial configuration as produced by the generator module of Simu-D. Monomers are colored according to the lowest value of the CCE norm (descriptor module). Blue, red, and green colors denote HCP, FCC, and FIV similarity, respectively.
