# Supplementary material for: Simu-D: A Simulator-Descriptor Suite for Polymer-Based Systems under Extreme Conditions
Source: MDPI journal article supplement (doi:10.3390/ijms222212464), 2021-11-18
Supplement: s1 [file s1]

This area requires a 3D PDF enabled viewer such as Adobe Reader.

Figure 4d. Bulk system configurations of semi-flexible chains of tangent hard spheres of uniform size with average length of  $N = 100$  and an equilibrium angle of  $\theta = 120^\circ$  at progressively higher volume fractions,  $\phi$ : 0.001, 0.10 and 0.60. All three system configurations shown together allowing for a visual comparison of their dimensions. Monomers are colored according to their parent chain. Sphere monomers are shown with coordinates of their centers subjected to periodic boundary condition.
