# Supplementary material for: Simu-D: A Simulator-Descriptor Suite for Polymer-Based Systems under Extreme Conditions
Source: MDPI journal article supplement (doi:10.3390/ijms222212464), 2021-11-18
Supplement: s1 [file s1]

This area requires a 3D PDF enabled viewer such as Adobe Reader.

Figure 9a. Final configurations of systems whose sites interact with the attractive square well potential. NVT simulations on chains ( $SW = 1.2$ ,  $\sigma = 1.15$ ,  $N = 12$ ,  $N_{ch} = 100$ ,  $\beta = 0.05$ ). Sites are colored according to the CCE norm: Blue, red, green, cyan, and purple correspond to sites with HCP, FCC, FIV, BCC, and HEX similarity, respectively.
