# Supplementary material for: Simu-D: A Simulator-Descriptor Suite for Polymer-Based Systems under Extreme Conditions
Source: MDPI journal article supplement (doi:10.3390/ijms222212464), 2021-11-18
Supplement: s1 [file s1]

This area requires a 3D PDF enabled viewer such as Adobe Reader.

Figure 11a. System snapshots of linear, fully flexible chains ( $N_{ch} = 60$ ,  $N = 12$ ) under spherical confinement at a packing density of  $\rho = 0.30$ . Monomers are colored according to the parent chain.
