# Supplementary material for: Simu-D: A Simulator-Descriptor Suite for Polymer-Based Systems under Extreme Conditions
Source: MDPI journal article supplement (doi:10.3390/ijms222212464), 2021-11-18
Supplement: s1 [file s1]

This area requires a 3D PDF enabled viewer such as Adobe Reader.

Figure 15. Terminally grafted nanoparticles on polymer chains at a volume fraction of  $\phi = 0.50$  as simulated through the Simu-D suite. Each nanoparticle, shown in red and in semitransparent format, has a size of  $d_{\text{nano}} = 8$  and is anchored to a single polymer chain. Macromolecules are represented as freely jointed chains of tangent hard spheres with an average length of  $N = 100$ .
