# Supplementary material for: Simu-D: A Simulator-Descriptor Suite for Polymer-Based Systems under Extreme Conditions
Source: MDPI journal article supplement (doi:10.3390/ijms222212464), 2021-11-18
Supplement: s1 [file s1]

This area requires a 3D PDF enabled viewer such as Adobe Reader.

Figure 4b. Bulk system configuration of semi-flexible chains of tangent hard spheres of uniform size with average length of  $N = 100$  and an equilibrium angle of  $\theta = 120^\circ$  at  $\phi = 0.01$ . Monomers are colored according to their parent chain. Sphere monomers are shown with coordinates of their centers subjected to periodic boundary conditions.
