# Supplementary material for: Simu-D: A Simulator-Descriptor Suite for Polymer-Based Systems under Extreme Conditions
Source: MDPI journal article supplement (doi:10.3390/ijms222212464), 2021-11-18
Supplement: s1 [file s1]

Archive with 21 entries (21 files):
- ijms-22-12464-s002/fig10a.pdf
- ijms-22-12464-s002/fig10b.pdf
- ijms-22-12464-s002/fig11a.pdf
- ijms-22-12464-s002/fig11b.pdf
- ijms-22-12464-s002/fig11c.pdf
- ijms-22-12464-s002/fig12a.pdf
- ijms-22-12464-s002/fig12b.pdf
- ijms-22-12464-s002/fig13a.pdf
- ijms-22-12464-s002/fig13b.pdf
- ijms-22-12464-s002/fig15.pdf
- ijms-22-12464-s002/fig4a.pdf
- ijms-22-12464-s002/fig4b.pdf
- ijms-22-12464-s002/fig4c.pdf
- ijms-22-12464-s002/fig4d.pdf
- ijms-22-12464-s002/fig6a.pdf
- ijms-22-12464-s002/fig6b.pdf
- ijms-22-12464-s002/fig7a.pdf
- ijms-22-12464-s002/fig7b.pdf
- ijms-22-12464-s002/fig9a.pdf
- ijms-22-12464-s002/fig9b.pdf
- ijms-22-12464-s002/manuscript_interactive_3D.pdf
